# Supplementary material
Source: ML conference proceedings conference paper supplement (https://proceedings.neurips.cc/paper_files/paper/2020/hash/1ac978c8020be6d7212aa71d4f040fc3-Abstract.html)
Supplement: Supplementary file [file 1ac978c8020be6d7212aa71d4f040fc3-Supplemental.pdf]

# Supplementary Material: Asymptotic Guarantees for Generative Modeling based on the Smooth Wasserstein Distance

## A Additional result and proofs for Section 2

### A.1 Concentration inequalities for $W_1^{(\sigma)}(P_n, P)$

We consider a quantitative concentration inequality for  $W_1^{(\sigma)}(P_n, P)$ . For  $\alpha > 0$ , let  $\|\xi\|_{\psi_\alpha} := \inf\{C > 0 : \mathbb{E}[e^{(|\xi|/C)^\alpha}] \leq 2\}$  be the Orlicz  $\psi_\alpha$ -norm for a real-valued random variable  $\xi$  (if  $\alpha \in (0, 1)$ , then  $\|\cdot\|_{\psi_\alpha}$  is a quasi-norm). In Section A.4 we prove the following.

**Corollary 3** (Concentration inequality). *Assume  $\mathbb{E}[W_1^{(\sigma)}(P_n, P)] < \infty$ . The following hold:*

(i) *If  $P$  is compactly supported with support  $\mathcal{X}$ , then*

$$\mathbb{P}\left(W_1^{(\sigma)}(P_n, P) \geq \mathbb{E}[W_1^{(\sigma)}(P_n, P)] + t\right) \leq e^{-\frac{nt^2}{\text{diam}(\mathcal{X})^2}}, \quad \forall t > 0.$$

(ii) *If  $\|X\|_{\psi_\alpha} < \infty$  for some  $\alpha \in (0, 1]$ , where  $X \sim P$ , then for any  $\eta > 0$ , there exists a constant  $C = C_{\eta, \alpha}$  depending only on  $\eta, \alpha$  such that*

$$\begin{aligned} \mathbb{P}\left(W_1^{(\sigma)}(P_n, P) \geq (1 + \eta)\mathbb{E}[W_1^{(\sigma)}(P_n, P)] + t\right) &\leq \exp\left(-\frac{nt^2}{C(P\|x\|^2 + \sigma^2 d)}\right) \\ &+ 3 \exp\left(-\left(\frac{nt}{C\left(\|\max_{1 \leq i \leq n} \|X_i\|\|_{\psi_\alpha} + \sigma\sqrt{d}\right)}\right)^\alpha\right), \quad \forall t > 0. \end{aligned}$$

(iii) *If  $P\|x\|^q < \infty$  for some  $q \in [1, \infty)$ , then for any  $\eta > 0$ , there exists a constant  $C = C_{\eta, q}$  depending only on  $\eta, q$  such that*

$$\begin{aligned} \mathbb{P}\left(W_1^{(\sigma)}(P_n, P) \geq (1 + \eta)\mathbb{E}[W_1^{(\sigma)}(P_n, P)] + t\right) &\leq \exp\left(-\frac{nt^2}{C(P\|x\|^2 + \sigma^2 d)}\right) \\ &+ \frac{C\left(\mathbb{E}[\max_{1 \leq i \leq n} \|X_i\|^q] + \sigma^q d^{q/2}\right)}{n^q t^q}, \quad \forall t > 0. \end{aligned}$$

### A.2 Proof of Theorem 1

Recall that  $\varphi_\sigma$  is the density function of  $\mathcal{N}(0, \sigma^2 I_d)$ , i.e.,  $\varphi_\sigma(x) = (2\pi\sigma^2)^{-d/2} e^{-\|x\|^2/(2\sigma^2)}$  for  $x \in \mathbb{R}^d$ . Noting that the measure  $P_n * \mathcal{N}_\sigma$  has density

$$x \mapsto \frac{1}{n} \sum_{i=1}^n \varphi_\sigma(x - X_i) = \frac{1}{n} \sum_{i=1}^n \varphi_\sigma(X_i - x),$$

we arrive at the expression

$$W_1^{(\sigma)}(P_n, P) = \sup_{f \in \text{Lip}_1} \left[ \frac{1}{n} \sum_{i=1}^n f * \varphi_\sigma(X_i) - P f * \varphi_\sigma \right]. \quad (3)$$

The RHS of (3) does not change even if we replace  $f$  by  $f - f(x^*)$  for any fixed point  $x^*$  (as  $\int_{\mathbb{R}^d} \varphi_\sigma(x^* - y) dy = 1$ ). Thus, the problem boils down to showing that the function class

$$\check{\mathcal{F}} := \check{\mathcal{F}}_{\sigma, d} := \{f * \varphi_\sigma : f \in \text{Lip}_{1,0}\} \quad \text{with } \text{Lip}_{1,0} := \{f \in \text{Lip}_1 : f(0) = 0\}$$

is  $P$ -Donsker. Pick any  $f \in \text{Lip}_{1,0}$ , and consider

$$f_\sigma(x) := f * \varphi_\sigma(x) = \int f(y) \varphi_\sigma(x - y) dy.$$

We see that, since  $|f(y)| \leq |f(0)| + \|y\| = \|y\|$ ,

$$\begin{aligned} |f_\sigma(x)| &\leq \int \|y\| \varphi_\sigma(x-y) \, \mathbf{d}y \leq \int (\|x\| + \|x-y\|) \varphi_\sigma(x-y) \, \mathbf{d}y \\ &\leq \|x\| + \int \|y\| \varphi_\sigma(y) \, \mathbf{d}y \leq \|x\| + \left( \int_{\mathbb{R}^d} \|y\|^2 \varphi_\sigma(y) \, \mathbf{d}y \right)^{1/2} \\ &= \|x\| + \sigma \sqrt{d}. \end{aligned}$$

In general, for a vector  $k = (k_1, \dots, k_d)$  of  $d$  nonnegative integers, define the differential operator

$$D^k = \frac{\partial^{|k|}}{\partial x_1^{k_1} \dots \partial x_d^{k_d}},$$

with  $|k| = \sum_{i=1}^d k_i$ . We next give a uniform bound on the derivatives of  $f_\sigma$ , for any  $f \in \text{Lip}_1$ .

**Lemma 1** (Uniform bound on derivatives). *For any  $f \in \text{Lip}_1$  and any nonzero multiindex  $k = (k_1, \dots, k_d)$ , we have*

$$|D^k f_\sigma(x)| \leq \sigma^{-|k|+1} \sqrt{(|k|-1)!}, \quad \forall x \in \mathbb{R}^d.$$

*Proof.* Let  $H_m(z)$  denote the Hermite polynomial of degree  $m$  defined by

$$H_m(z) = (-1)^m e^{z^2/2} \left[ \frac{d^m}{dz^m} e^{-z^2/2} \right], \quad m = 0, 1, \dots$$

Note that for  $Z \sim \mathcal{N}(0, 1)$ ,  $\mathbb{E}[H_m(Z)^2] = m!$ .

A straightforward computation shows that

$$D_x^k \varphi_\sigma(x-y) = \varphi_\sigma(x-y) \left[ \prod_{j=1}^d (-1)^{k_j} \sigma^{-k_j} H_{k_j}((x_j - y_j)/\sigma) \right]$$

for any multiindex  $k = (k_1, \dots, k_d)$ , where  $D_x$  means that the differential operator is applied to  $x$ . Hence, we have

$$\begin{aligned} D^k f_\sigma(x) &= \int f(y) \varphi_\sigma(x-y) \left[ \prod_{j=1}^d (-1)^{k_j} \sigma^{-k_j} H_{k_j}((x_j - y_j)/\sigma) \right] \, \mathbf{d}y \\ &= \int f(x - \sigma y) \varphi_1(y) \left[ \prod_{j=1}^d (-1)^{k_j} \sigma^{-k_j} H_{k_j}(y_j) \right] \, \mathbf{d}y, \end{aligned}$$

so that, by 1-Lipschitz continuity of  $f$ ,

$$|D^k f_\sigma(x) - D^k f_\sigma(x')| \leq \|x - x'\| \int \varphi_1(y) \left[ \prod_{j=1}^d \sigma^{-k_j} |H_{k_j}(y_j)| \right] \, \mathbf{d}y.$$

Note that the integral on the RHS equals

$$\prod_{j=1}^d \sigma^{-k_j} \mathbb{E}[|H_{k_j}(Z)|] \leq \prod_{j=1}^d \sigma^{-k_j} \sqrt{\mathbb{E}[|H_{k_j}(Z)|^2]} = \prod_{j=1}^d \sigma^{-k_j} \sqrt{k_j!} \leq \sigma^{-|k|} \sqrt{|k|!},$$

where  $Z \sim \mathcal{N}(0, 1)$ . The conclusion of the lemma follows from induction on the size of  $|k|$ .  $\square$

We will use the following technical result.

**Lemma 2** (Metric entropy bound for Hölder ball). *Let  $\mathcal{X}$  be a bounded convex subset of  $\mathbb{R}^d$  with nonempty interior. For given  $N \in \mathbb{N}$  and  $M > 0$ , let  $C^N(\mathcal{X})$  be the set of continuous real functions on  $\mathcal{X}$  that are  $N$ -times differentiable on the interior of  $\mathcal{X}$ , and consider the Hölder ball with smoothness  $N$  and radius  $M$*

$$C_M^N(\mathcal{X}) := \{f \in C^N(\mathcal{X}) : \|f\|_{C^N(\mathcal{X})} \leq M\},$$

where  $\|f\|_{C^N(\mathcal{X})} := \max_{0 \leq |k| \leq N} \sup_x |D^k f(x)|$  (the suprema are taken over the interior of  $\mathcal{X}$ ). Then, the metric entropy of  $C_M^N(\mathcal{X})$  (w.r.t. the uniform norm  $\|\cdot\|_\infty$ ) can be bounded as

$$\log N(\epsilon M, C_M^N(\mathcal{X}), \|\cdot\|_\infty) \lesssim_{d,N,\text{diam}(\mathcal{X})} \epsilon^{-d/N}, \quad 0 < \epsilon \leq 1,$$

*Proof of Lemma 2.* See Theorem 2.7.1 in [33]. □

We are now in position to prove Theorem 1.

*Proof of Theorem 1.* The proof applies Theorem 1.1 in [64] to the function class  $\check{\mathcal{F}} = \check{\mathcal{F}}_{\sigma,d} = \{f * \varphi_\sigma : f \in \text{Lip}_{1,0}\}$  to show that it is  $P$ -Donsker. We begin with noting that the function class  $\check{\mathcal{F}}$  has envelope  $\check{F}(x) := \check{F}_{\sigma,d}(x) := \|x\| + \sigma\sqrt{d}$ . By assumption,  $P\check{F}^2 < \infty$ .

Next, for each  $j$ , consider the restriction of  $\check{\mathcal{F}}$  to  $I_j$ , denoted as  $\check{\mathcal{F}}_j = \{f\mathbb{1}_{I_j} : f \in \check{\mathcal{F}}\}$ . To invoke [64, Theorem 1.1], we have to verify that each function class  $\check{\mathcal{F}}_j$  is  $P$ -Donsker and to bound each  $\mathbb{E}[\|\mathbb{G}_n\|_{\check{\mathcal{F}}_j}]$  where  $\mathbb{G}_n := \sqrt{n}(P_n - P)$  and  $\|\cdot\|_{\check{\mathcal{F}}_j} = \sup_{f \in \check{\mathcal{F}}_j} |\cdot|$ . In view of Lemma 1,  $\check{\mathcal{F}}_j$  can be regarded as a subset of  $C_M^N(I_j)$  with  $N = \lfloor d/2 \rfloor + 1$  and  $M'_j = (\sup_{I_j} \|x\| + \sigma\sqrt{d}) \vee \sigma^{-\lfloor d/2 \rfloor} \sqrt{\lfloor d/2 \rfloor!}$ . Thus, by Lemma 2, the  $L^2(Q)$ -metric entropy of  $\check{\mathcal{F}}_j$  for any probability measure  $Q$  on  $\mathbb{R}^d$  can be bounded as

$$\log N(\epsilon M'_j Q(I_j)^{1/2}, \check{\mathcal{F}}_j, L^2(Q)) \lesssim_{d,K} \epsilon^{-d/(\lfloor d/2 \rfloor + 1)}.$$

The square root of the RHS is integrable (w.r.t.  $\epsilon$ ) around 0, so that  $\check{\mathcal{F}}_j$  is  $P$ -Donsker by Theorem 2.5.2 in [33], and by Theorem 2.14.1 in [33], we obtain

$$\mathbb{E}[\|\mathbb{G}_n\|_{\check{\mathcal{F}}_j}] \lesssim_{d,K} M'_j P(I_j)^{1/2} \lesssim_d \sigma^{-\lfloor d/2 \rfloor} M_j P(I_j)^{1/2}$$

with  $M_j = \sup_{I_j} \|x\|$ . By assumption, the RHS is summable over  $j$ .

By Theorem 1.1 in [64] we conclude that  $\check{\mathcal{F}}$  is  $P$ -Donsker, which implies that there exists a tight version of  $P$ -Brownian bridge process  $G_P$  in  $\ell^\infty(\check{\mathcal{F}})$  such that  $(\mathbb{G}_n f)_{f \in \check{\mathcal{F}}}$  converges weakly in  $\ell^\infty(\check{\mathcal{F}})$  to  $G_P$ . Finally, the continuous mapping theorem yields that

$$\sqrt{n}W_1^{(\sigma)}(P_n, P) = \sup_{f \in \check{\mathcal{F}}} \mathbb{G}_n f \xrightarrow{d} \sup_{f \in \check{\mathcal{F}}} G_P(f) = \sup_{f \in \text{Lip}_{1,0}} G_P^{(\sigma)}(f),$$

where  $G_P^{(\sigma)}(f) := G_P(f * \varphi_\sigma)$ . By construction, the Gaussian process  $(G_P^{(\sigma)}(f))_{f \in \text{Lip}_{1,0}}$  is tight in  $\ell^\infty(\text{Lip}_{1,0})$ . The moment bound follows from summing up the moment bound for each  $\check{\mathcal{F}}_j$ . This completes the proof. □

### A.3 Proof of Corollary 1

We start with proving the following technical lemma.

**Lemma 3** (Distribution of  $L_P^{(\sigma)}$ ). *Assume the conditions of Theorem 1 and that  $P$  is not a point mass. Then the distribution of  $L_P^{(\sigma)}$  is absolutely continuous with respect to (w.r.t.) Lebesgue measure and its density is positive and continuous on  $(0, \infty)$  except for at most countably many points.*

*Proof of Lemma 3.* From the proof of Theorem 1 and the fact that  $\text{Lip}_1$  is symmetric, we have  $L_P^{(\sigma)} = \|G_P\|_{\check{\mathcal{F}}}$  with  $\|\cdot\|_{\check{\mathcal{F}}} := \sup_{f \in \check{\mathcal{F}}} |\cdot|$ . Since  $G_P$  is a tight Gaussian process in  $\ell^\infty(\check{\mathcal{F}})$ ,

$\tilde{\mathcal{F}}$  is totally bounded for the pseudometric  $d_P(f, g) = \sqrt{\text{Var}_P(f - g)}$ , and  $G_P$  is a Borel measurable map into the space of  $d_P$ -uniformly continuous functions  $\mathcal{C}_u(\tilde{\mathcal{F}})$  equipped with the uniform norm  $\|\cdot\|_{\tilde{\mathcal{F}}}$ . Let  $F$  denote the distribution function of  $L_P^{(\sigma)}$ , and define

$$r_0 := \inf\{r \geq 0 : F(r) > 0\}.$$

From [69, Theorem 11.1],  $F$  is absolutely continuous on  $(r_0, \infty)$ , and there exists a countable set  $\Delta \subset (r_0, \infty)$  such that  $F'$  is positive and continuous on  $(r_0, \infty) \setminus \Delta$ . The theorem however does not exclude the possibility that  $F$  has a jump at  $r_0$ , and we will verify that (i)  $r_0 = 0$  and (ii)  $F$  has no jump at  $r = 0$ , which lead to the conclusion. The former follows from p. 57 in [32]. The latter is trivial since

$$F(0) - F(0-) = \mathbb{P}\left(L_P^{(\sigma)} = 0\right) \leq \mathbb{P}(G_P(f) = 0),$$

for any  $f \in \tilde{\mathcal{F}}$ . Because  $G_P$  is Gaussian we have  $\mathbb{P}(G_P(f) = 0) = 0$  unless  $f$  is constant  $P$ -a.s.  $\square$

*Proof of Corollary 1.* From Theorem 3.6.2 in [33] applied to the function class  $\tilde{\mathcal{F}}$ , together with the continuous mapping theorem, we see that conditionally on  $X_1, X_2, \dots$ ,

$$\sqrt{n}W_1^{(\sigma)}(P_n^B, P_n) = \sup_{f \in \tilde{\mathcal{F}}} \sqrt{n}(P_n^B - P_n)f \xrightarrow{d} L_P^{(\sigma)}$$

for almost every realization of  $X_1, X_2, \dots$ . The desired conclusion follows from the fact that the distribution function of  $L_P^{(\sigma)}$  is continuous (cf. Lemma 3) and Polya's theorem (cf. Lemma 2.11 in [70]).  $\square$

#### A.4 Proof of Corollary 3

Case (i) is Corollary 1 in [28]. Cases (ii) and (iii) follow from Theorems 4 and 2 in [71] and [72], respectively, applied to the function class  $\tilde{\mathcal{F}}$  using the envelope function  $\tilde{F}(x) = \|x\| + \sigma\sqrt{d}$ . We omit the details for brevity.  $\square$

## B Proofs for Section 4

### B.1 Preliminaries

The following technical lemmas will be needed.

**Lemma 4** (Continuity of  $W_1^{(\sigma)}$ ). *The smooth Wasserstein distance  $W_1^{(\sigma)}$  is lower semicontinuous (l.s.c.) relative to the weak convergence on  $\mathcal{P}(\mathbb{R}^d)$  and continuous in  $W_1$ . Explicitly, (i) if  $\mu_k \rightharpoonup \mu$  and  $\nu_k \rightharpoonup \nu$ , then*

$$\liminf_{k \rightarrow \infty} W_1^{(\sigma)}(\mu_k, \nu_k) \geq W_1^{(\sigma)}(\mu, \nu);$$

and (ii) if  $W_1(\mu_k, \mu) \rightarrow 0$  and  $W_1(\nu_k, \nu) \rightarrow 0$ , then

$$\lim_{k \rightarrow \infty} W_1^{(\sigma)}(\mu_k, \nu_k) = W_1^{(\sigma)}(\mu, \nu). \quad (4)$$

*Proof.* Part (i). We first note that if  $\mu_k \rightharpoonup \mu$ , then  $\mu_k * \mathcal{N}_\sigma \rightharpoonup \mu * \mathcal{N}_\sigma$ . This follows from the facts that weak convergence is equivalent to pointwise convergence of characteristic functions, and the Gaussian measure has a nonvanishing characteristic function  $\mathbb{E}_{X \sim \mathcal{N}_\sigma}[e^{it \cdot X}] = e^{-\sigma^2 \|t\|^2 / 2} \neq 0$  for all  $t \in \mathbb{R}^d$ . Now, if  $\mu_k \rightharpoonup \mu$  and  $\nu_k \rightharpoonup \nu$ , then  $\mu_k * \mathcal{N}_\sigma \rightharpoonup \mu * \mathcal{N}_\sigma$  and  $\nu_k * \mathcal{N}_\sigma \rightharpoonup \nu * \mathcal{N}_\sigma$ . From the lower semicontinuity of  $W_1$  relative to the weak convergence (cf. Remark 6.10 in [16]), we conclude that  $\liminf_{k \rightarrow \infty} W_1^{(\sigma)}(\mu_k, \nu_k) = \liminf_{k \rightarrow \infty} W_1(\mu_k * \mathcal{N}_\sigma, \nu_k * \mathcal{N}_\sigma) \geq W_1(\mu * \mathcal{N}_\sigma, \nu * \mathcal{N}_\sigma) = W_1^{(\sigma)}(\mu, \nu)$ .

Part (ii). Recall that  $W_1^{(\sigma)}$  generates the same topology as  $W_1$ , i.e.,

$$W_1^{(\sigma)}(\mu_k, \mu) \rightarrow 0 \iff W_1(\mu_k, \mu) \rightarrow 0.$$

See Theorem 2 in [28]. So if  $\mu_k \rightarrow \mu$  and  $\nu_k \rightarrow \nu$  in  $W_1$ , then  $W_1^{(\sigma)}(\mu_k, \mu) = W_1(\mu_k * \mathcal{N}_\sigma, \mu * \mathcal{N}_\sigma) \rightarrow 0$  and  $W_1^{(\sigma)}(\nu_k, \nu) = W_1(\nu_k * \mathcal{N}_\sigma, \nu * \mathcal{N}_\sigma) \rightarrow 0$ . Thus, by Corollary 6.9 in [16], we have  $W_1^{(\sigma)}(\mu_k, \nu_k) = W_1(\mu_k * \mathcal{N}_\sigma, \nu_k * \mathcal{N}_\sigma) \rightarrow W_1(\mu_k * \mathcal{N}_\sigma, \nu_k * \mathcal{N}_\sigma) = W_1^{(\sigma)}(\mu, \nu)$ .  $\square$

**Lemma 5** (Weierstrass criterion for the existence of minimizers). *Let  $\mathcal{X}$  be a compact metric space, and let  $f : \mathcal{X} \rightarrow \mathbb{R} \cup \{+\infty\}$  be l.s.c. (i.e.,  $\liminf_{x \rightarrow \bar{x}} f(x) \geq f(\bar{x})$  for any  $\bar{x} \in \mathcal{X}$ ). Then,  $\operatorname{argmin}_{x \in \mathcal{X}} f(x)$  is nonempty.*

*Proof.* See, e.g., p. 3 of [73].  $\square$

## B.2 Proof of Theorem 2

By Lemma 5, compactness of  $\Theta$ , and lower semicontinuity of the map  $\theta \mapsto W_1^{(\sigma)}(P_n(\omega), Q_\theta)$  (cf. Lemma 4), we see that  $\operatorname{argmin}_{\theta \in \Theta} W_1^{(\sigma)}(P_n(\omega), Q_\theta)$  is nonempty.

To prove the existence of a measurable estimator, we will apply Corollary 1 in [66]. Consider the empirical distribution as a function on  $\mathcal{X}^{\mathbb{N}}$  with  $\mathcal{X} = \mathbb{R}^d$ , i.e.,  $\mathcal{X}^{\mathbb{N}} \ni x = (x_1, x_2, \dots) \mapsto P_n(x) = n^{-1} \sum_{i=1}^n \delta_{x_i}$ . Observe that  $\mathcal{X}^{\mathbb{N}}$  and  $\mathbb{R}^{d_0}$  are both Polish,  $\mathcal{D} := \mathcal{X}^{\mathbb{N}} \times \Theta$  is a Borel subset of the product metric space  $\mathcal{X}^{\mathbb{N}} \times \mathbb{R}^{d_0}$ , the map  $\theta \mapsto W_1^{(\sigma)}(P_n(x), Q_\theta)$  is l.s.c. by Lemma 4, and the set  $\mathcal{D}_x = \{\theta \in \Theta : (x, \theta) \in \mathcal{D}\} \subset \mathbb{R}^{d_0}$  is  $\sigma$ -compact (as any subset in  $\mathbb{R}^{d_0}$  is  $\sigma$ -compact). Thus, in view of Corollary 1 of [66], it suffices to verify that the map  $(x, \theta) \mapsto W_1^{(\sigma)}(P_n(x), Q_\theta)$  is jointly measurable.

To this end, we use the following fact: for a real function  $\mathcal{Y} \times \mathcal{Z} \ni (y, z) \mapsto f(y, z) \in \mathbb{R}$  defined on the product of a separable metric space  $\mathcal{Y}$  (endowed with the Borel  $\sigma$ -field) and a measurable space  $\mathcal{Z}$ , if  $f(y, z)$  is continuous in  $y$  and measurable in  $z$ , then  $f$  is jointly measurable; see e.g. Lemma 4.51 in [74]. Equip  $\mathcal{P}_1(\mathbb{R}^d)$  with the metric  $W_1$  and the associated Borel  $\sigma$ -field; the metric space  $(\mathcal{P}_1(\mathbb{R}^d), W_1)$  is separable [16, Theorem 6.16]. Then, since the map  $\mathcal{X}^{\mathbb{N}} \ni x \mapsto P_n(x) \in \mathcal{P}_1(\mathbb{R}^d)$  is continuous (which is not difficult to verify), the map  $\mathcal{X}^{\mathbb{N}} \times \Theta \ni (x, \theta) \mapsto (P_n(x), \theta) \in \mathcal{P}_1(\mathbb{R}^d) \times \Theta$  is continuous and thus measurable. Second, by Lemma 4, the function  $\mathcal{P}_1(\mathbb{R}^d) \times \Theta \ni (\mu, \theta) \mapsto W_1^{(\sigma)}(\mu, Q_\theta) \in [0, \infty)$  is continuous in  $\mu$  and l.s.c. (and thus measurable) in  $\theta$ , from which we see that the map  $(\mu, \theta) \mapsto W_1^{(\sigma)}(\mu, Q_\theta)$  is jointly measurable. Conclude that the map  $(x, \theta) \mapsto W_1^{(\sigma)}(P_n(x), Q_\theta)$  is jointly measurable.  $\square$

## B.3 Proof of Theorem 3

The proof relies on Theorem 7.33 in [67], and is reminiscent of that of Theorem B.1 in [37]; we present a simpler derivation under our assumption.<sup>11</sup> To apply Theorem 7.33 in [67], we extend the map  $\theta \mapsto W_1^{(\sigma)}(P_n, Q_\theta)$  to the entire Euclidean space  $\mathbb{R}^{d_0}$  as

$$g_n(\theta) := \begin{cases} W_1^{(\sigma)}(P_n, Q_\theta) & \text{if } \theta \in \Theta \\ +\infty & \text{if } \theta \in \mathbb{R}^{d_0} \setminus \Theta \end{cases}.$$

Likewise, define

$$g(\theta) := \begin{cases} W_1^{(\sigma)}(P, Q_\theta) & \text{if } \theta \in \Theta \\ +\infty & \text{if } \theta \in \mathbb{R}^{d_0} \setminus \Theta \end{cases}.$$

The function  $g_n$  is stochastic,  $g_n(\theta) = g_n(\theta, \omega)$ , but  $g$  is non-stochastic. By construction, we see that  $\operatorname{argmin}_{\theta \in \mathbb{R}^{d_0}} g_n(\theta) = \operatorname{argmin}_{\theta \in \Theta} W_1^{(\sigma)}(P_n, Q_\theta)$  and  $\operatorname{argmin}_{\theta \in \mathbb{R}^{d_0}} g(\theta) = \operatorname{argmin}_{\theta \in \Theta} W_1^{(\sigma)}(P, Q_\theta)$ . In addition, by Lemma 4, continuity of the map  $\theta \mapsto Q_\theta$  relative to the weak topology, and closedness of the parameter space  $\Theta$ , we see that both  $g_n$  and  $g$  are l.s.c. (on  $\mathbb{R}^{d_0}$ ). The main step of the proof is to show a.s. epi-convergence of  $g_n$  to  $g$ . Recall the definition of epi-convergence (in fact, this is an equivalent characterization; see [67, Proposition 7.29]):

<sup>11</sup>Theorem B.1 in [37] applies Theorem 7.31 in [67]. To that end, one has to extend the maps  $\theta \mapsto \mathcal{W}_p(\hat{\mu}_n, \mu_\theta)$  and  $\theta \mapsto \mathcal{W}_p(\mu_*, \mu_\theta)$  to the entire Euclidean space  $\mathbb{R}^{d_\theta}$ . The extension was not mentioned in the proof of [37, Theorem B.1], although this missing step does not affect their final result.

**Definition 1** (Epi-convergence). For extended-real-valued functions  $f_n, f$  on  $\mathbb{R}^{d_0}$  with  $f$  being l.s.c., we say that  $f_n$  epi-converges to  $f$  if the following two conditions hold:

- (i)  $\liminf_{n \rightarrow \infty} \inf_{\theta \in \mathcal{K}} f_n(\theta) \geq \inf_{\theta \in \mathcal{K}} f(\theta)$  for any compact set  $\mathcal{K} \subset \mathbb{R}^{d_0}$ ; and
- (ii)  $\limsup_{n \rightarrow \infty} \inf_{\theta \in \mathcal{U}} f_n(\theta) \leq \inf_{\theta \in \mathcal{U}} f(\theta)$  for any open set  $\mathcal{U} \subset \mathbb{R}^{d_0}$ .

We also need the concept of level-boundedness.

**Definition 2** (Level-boundedness). For an extended-real-valued function  $f$  on  $\mathbb{R}^{d_0}$ , we say that  $f$  is level-bounded if for any  $\alpha \in \mathbb{R}$ , the set  $\{\theta \in \mathbb{R}^{d_0} : f(\theta) \leq \alpha\}$  is bounded (possibly empty).

We are now in position to prove Theorem 3.

*Proof of Theorem 3.* By boundedness of the parameter space  $\Theta$ , both  $g_n$  and  $g$  are level-bounded by construction as the (lower) level sets are included in  $\Theta$ . In addition, by assumption, both  $g_n$  and  $g$  are proper (an extended-real-valued function  $f$  on  $\mathbb{R}^{d_0}$  is proper if the set  $\{\theta \in \mathbb{R}^{d_0} : f(\theta) < \infty\}$  is nonempty). In view of Theorem 7.33 in [67], it remains to prove that  $g_n$  epi-converges to  $g$  a.s. To verify property (i) in the definition of epi-convergence, recall that  $P_n \rightarrow P$  in  $W_1$  (and hence in  $W_1^{(\sigma)}$ ) a.s. Pick any  $\omega \in \Omega$  such that  $P_n(\omega) \rightarrow P$  in  $W_1$ . Pick any compact set  $\mathcal{K} \subset \mathbb{R}^{d_0}$ . Since  $g_n(\cdot, \omega)$  is l.s.c., by Lemma 5, there exists  $\theta_n(\omega) \in \mathcal{K}$  such that  $g_n(\theta_n(\omega), \omega) = \inf_{\theta \in \mathcal{K}} g_n(\theta, \omega)$ . Up to extraction of subsequences, we may assume  $\theta_n(\omega) \rightarrow \theta^*(\omega)$  for some  $\theta^*(\omega) \in \mathcal{K}$ . If  $\theta^*(\omega) \notin \Theta$ , then by closedness of  $\Theta$ ,  $\theta_n(\omega) \notin \Theta$  for all sufficiently large  $n$ . Thus, we have

$$\liminf_{n \rightarrow \infty} \inf_{\theta \in \mathcal{K}} g_n(\theta, \omega) = \liminf_{n \rightarrow \infty} g_n(\theta_n(\omega), \omega) = +\infty,$$

so that  $\liminf_{n \rightarrow \infty} \inf_{\theta \in \mathcal{K}} g_n(\theta, \omega) \geq \inf_{\theta \in \mathcal{K}} g(\theta)$ . Next, consider the case where  $\theta^*(\omega) \in \Theta$ . In this case,  $\theta_n(\omega) \in \Theta$  for all  $n$  (otherwise,  $+\infty = g_n(\theta_n(\omega), \omega) > g_n(\theta^*(\omega), \omega)$ , which contradicts the construction of  $\theta_n(\omega)$ ). Thus,  $g_n(\theta_n(\omega), \omega) = W_1^{(\sigma)}(P_n(\omega), Q_{\theta_n(\omega)})$ , so that

$$\begin{aligned} \liminf_{n \rightarrow \infty} \inf_{\theta \in \mathcal{K}} g_n(\theta_n(\omega), \omega) &= \liminf_{n \rightarrow \infty} W_1^{(\sigma)}(P_n(\omega), Q_{\theta_n(\omega)}) \\ &\stackrel{(a)}{\geq} W_1^{(\sigma)}(P, Q_{\theta^*(\omega)}) \\ &\geq \inf_{\theta \in \mathcal{K}} g(\theta), \end{aligned} \tag{5}$$

where (a) follows from Lemma 4.

To verify property (ii) in the definition of epi-convergence, pick any open set  $\mathcal{U} \subset \Theta$ . It is enough to consider the case where  $\mathcal{U} \cap \Theta \neq \emptyset$ . Let  $\{\theta'_n\}_{n=1}^\infty \subset \mathcal{U}$  be a sequence with  $\lim_{n \rightarrow \infty} g(\theta'_n) = \inf_{\theta \in \mathcal{U}} g(\theta)$ . Since  $\inf_{\theta \in \mathcal{U}} g(\theta)$  is finite, we may assume that  $\theta'_n \in \mathcal{U} \cap \Theta$  for all  $n$ . Thus, we have

$$\begin{aligned} \limsup_{n \rightarrow \infty} \inf_{\theta \in \mathcal{U}} g_n(\theta, \omega) &\leq \limsup_{n \rightarrow \infty} g_n(\theta'_n, \omega) \\ &= \limsup_{n \rightarrow \infty} W_1^{(\sigma)}(P_n(\omega), Q_{\theta'_n}) \\ &\leq \underbrace{\lim_{n \rightarrow \infty} W_1^{(\sigma)}(P_n(\omega), P)}_{=0} + \underbrace{\lim_{n \rightarrow \infty} W_1^{(\sigma)}(P, Q_{\theta'_n})}_{=\inf_{\theta \in \mathcal{U}} g(\theta)} \\ &= \inf_{\theta \in \mathcal{U}} g(\theta). \end{aligned} \tag{6}$$

Conclude that  $g_n$  epi-converges to  $g$  a.s. This completes the proof.  $\square$

#### B.4 Proof of Theorem 4

Recall that  $P = Q_{\theta^*}$ . Condition (ii) implies that  $\operatorname{argmin}_{\theta \in \Theta} W_1^{(\sigma)}(P, Q_\theta) = \{\theta^*\}$ . Hence, by Theorem 3, for any neighborhood  $N$  of  $\theta^*$ ,

$$\inf_{\theta \in \Theta} W_1^{(\sigma)}(P_n, Q_\theta) = \inf_{\theta \in N} W_1^{(\sigma)}(P_n, Q_\theta)$$

with probability approaching one.

Define  $R_\theta^{(\sigma)} := Q_\theta^{(\sigma)} - P^{(\sigma)} - \langle \theta - \theta^*, D^{(\sigma)} \rangle \in \ell^\infty(\text{Lip}_{1,0})$ , and choose  $N_1$  as a neighborhood of  $\theta^*$  such that

$$\|\langle \theta - \theta^*, D^{(\sigma)} \rangle\|_{\text{Lip}_{1,0}} - \|R_\theta^{(\sigma)}\|_{\text{Lip}_{1,0}} \geq \frac{1}{2}C, \quad \forall \theta \in N_1, \quad (7)$$

for some constant  $C > 0$ . Such  $N_1$  exists since conditions (iii) and (iv) ensure the existence of an increasing function  $\eta(\delta) = o(1)$  (as  $\delta \rightarrow 0$ ) and a constant  $C > 0$  such that  $\|R^{(\sigma)}(\theta)\|_{\text{Lip}_{1,0}} \leq \|\theta - \theta^*\| \eta(\|\theta - \theta^*\|)$  and  $\|\langle t, D^{(\sigma)} \rangle\|_{\text{Lip}_{1,0}} \geq C\|t\|$  for all  $t \in \mathbb{R}^{d_0}$ .

For any  $\theta \in N_1$ , the triangle inequality and (7) imply that

$$W_1^{(\sigma)}(P_n, Q_\theta) \geq \frac{C}{2} \|\theta - \theta^*\| - W_1^{(\sigma)}(P_n, P). \quad (8)$$

For  $\xi_n := \frac{4\sqrt{n}}{C} W_1^{(\sigma)}(P_n, P)$ , consider the (random) set  $N_2 := \{\theta \in \Theta : \sqrt{n}\|\theta - \theta^*\| \leq \xi_n\}$ . Note that  $\xi_n$  is of order  $O_{\mathbb{P}}(1)$  by Theorem 1. By the definition of  $\xi_n$ ,  $\inf_{\theta \in N_1} W_1^{(\sigma)}(P_n, Q_\theta)$  is unchanged if  $N_1$  is replaced with  $N_1 \cap N_2$ ; indeed, if  $\theta \in N_2^c$ , then  $W_1^{(\sigma)}(P_n, Q_\theta) > \frac{C}{2} \frac{\xi_n}{\sqrt{n}} - W_1^{(\sigma)}(P_n, P) = W_1^{(\sigma)}(P_n, P)$ , so that  $\inf_{\theta \in N_2^c} W_1^{(\sigma)}(P_n, Q_\theta) > W_1^{(\sigma)}(P_n, P) \geq \inf_{\theta \in N_1} W_1^{(\sigma)}(P_n, Q_\theta)$ .

Reparametrizing  $t := \sqrt{n}(\theta - \theta^*)$  and setting  $T_n := \{t \in \mathbb{R}^{d_0} : \|t\| \leq \xi_n, \theta^* + t/\sqrt{n} \in \Theta\}$ , we have the following approximation

$$\begin{aligned} \sup_{t \in T_n} \left| \underbrace{\sqrt{n} \|P_n^{(\sigma)} - Q_{\theta^* + t/\sqrt{n}}^{(\sigma)}\|_{\text{Lip}_{1,0}}}_{=W_1^{(\sigma)}(P_n, Q_{\theta^* + t/\sqrt{n}})} - \underbrace{\|\sqrt{n}(P_n^{(\sigma)} - P^{(\sigma)}) - \langle t, D^{(\sigma)} \rangle\|_{\text{Lip}_{1,0}}}_{=\mathbb{G}_n^{(\sigma)}} \right| \\ \leq \sup_{t \in T_n} \sqrt{n} \|R_{\theta^* + t/\sqrt{n}}^{(\sigma)}\|_{\text{Lip}_{1,0}} \\ \leq \xi_n \eta(\xi_n/\sqrt{n}) \\ = o_{\mathbb{P}}(1). \end{aligned} \quad (9)$$

Observe that any minimizer  $t^* \in \mathbb{R}^{d_0}$  of the function  $h_n(t) := \|\mathbb{G}_n^{(\sigma)} - \langle t, D^{(\sigma)} \rangle\|_{\text{Lip}_{1,0}}$  satisfies  $\|t^*\| \leq \xi_n$ ; indeed if  $\|t^*\| > \xi_n$ , then  $h_n(t^*) \geq C\|t^*\| - \|\mathbb{G}_n^{(\sigma)}\|_{\text{Lip}_{1,0}} = C\|t^*\| - \sqrt{n}W_1^{(\sigma)}(P_n, P) = 3\sqrt{n}W_1^{(\sigma)}(P_n, P) = 3h_n(0)$ , which contradicts the assumption that  $t^*$  is a minimizer of  $h_n(t)$ . Since by assumption  $\theta^* \in \text{int}(\Theta)$ , the set of minimizers of  $h_n$  lies inside  $T_n$ . Conclude that

$$\inf_{\theta \in \Theta} \sqrt{n}W_1^{(\sigma)}(P_n, Q_\theta) = \inf_{t \in \mathbb{R}^{d_0}} \|\mathbb{G}_n^{(\sigma)} - \langle t, D^{(\sigma)} \rangle\|_{\text{Lip}_{1,0}} + o_{\mathbb{P}}(1). \quad (10)$$

Now, from the proof of Theorem 1 and the fact that the map  $G \mapsto (G(f * \varphi_\sigma))_{f \in \text{Lip}_{1,0}}$  is continuous (indeed, isometric) from  $\ell^\infty(\check{\mathcal{F}})$  into  $\ell^\infty(\text{Lip}_{1,0})$ , we see that  $(\mathbb{G}_n^{(\sigma)} f)_{f \in \text{Lip}_{1,0}} \rightarrow G_P^{(\sigma)}$  weakly in  $\ell^\infty(\text{Lip}_{1,0})$

Applying the continuous mapping theorem to  $L \mapsto \inf_{t \in \mathbb{R}^{d_0}} \|L - \langle t, D^{(\sigma)} \rangle\|_{\text{Lip}_{1,0}}$  and using the approximation (10), we obtain the conclusion of the theorem.  $\square$

## B.5 Proof of Corollary 2

The proof relies on the following result on weak convergence of argmin solutions of convex stochastic functions. The following lemma is a simple modification of Theorem 1 in [75]. Similar techniques can be found in [76] and [77].

**Lemma 6.** *Let  $H_n(t)$  and  $H(t)$  be convex stochastic functions on  $\mathbb{R}^{d_0}$ . Suppose that (i)  $\text{argmin}_{t \in \mathbb{R}^{d_0}} H(t)$  is unique a.s., and (ii) for any finite set of points  $t_1, \dots, t_k \in \mathbb{R}^{d_0}$ , we have  $(H_n(t_1), \dots, H_n(t_k)) \xrightarrow{d} (H(t_1), \dots, H(t_k))$ . Then, for any sequence  $\{\hat{t}_n\}_{n \in \mathbb{N}}$  such that  $H_n(\hat{t}_n) \leq \inf_{t \in \mathbb{R}^{d_0}} H_n(t) + o_{\mathbb{P}}(1)$ , we have  $\hat{t}_n \xrightarrow{d} \text{argmin}_{t \in \mathbb{R}^{d_0}} H(t)$ .*

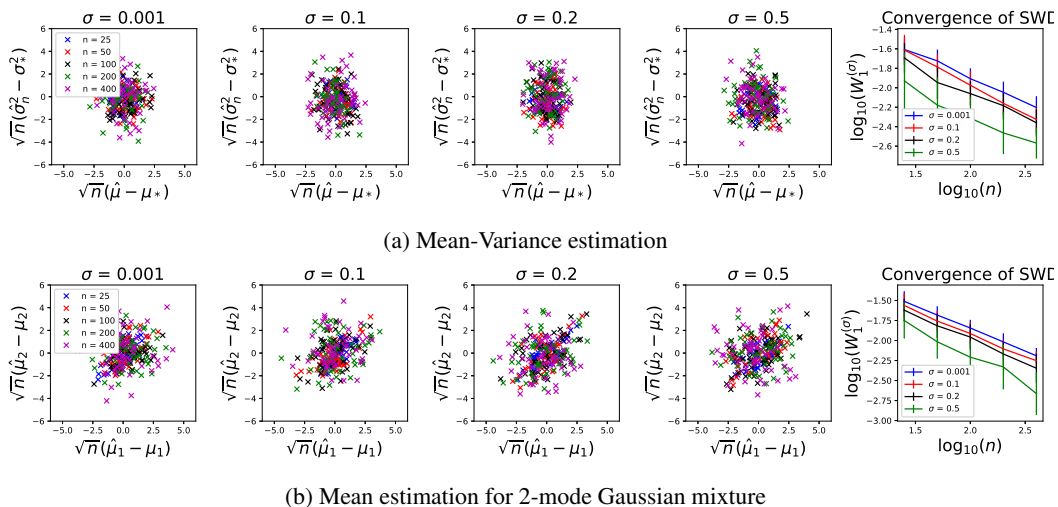

Figure 4: One-dimensional limiting distributions for: (a) the mean and variance of an MSWE-based generative model fitted to  $P = \mathcal{N}(\mu_*, \sigma_*^2)$ , with  $\mu_* = 0$  and  $\sigma_* = 1$ ; and (b) the two mean parameters of the mixture  $P = 0.5\mathcal{N}(\mu_1, 1) + 0.5\mathcal{N}(\mu_2, 1)$ , for  $\mu_1 = 0$  and  $\mu_2 = 1$ . Also shown on a log-log scale (with error bars) is the SWD convergence as a function of  $n$ .

*Proof of Corollary 2.* By Theorem 3,  $\hat{\theta}_n \rightarrow \theta^*$  in probability. From equation (8) and the definition of  $\hat{\theta}_n$ , we see that, with probability approaching one,

$$\underbrace{\inf_{\theta \in \Theta} \sqrt{n}W_1^{(\sigma)}(P_n, Q_\theta)}_{=O_{\mathbb{P}}(1)} + o_{\mathbb{P}}(1) \geq \sqrt{n}W_1^{(\sigma)}(P_n, Q_{\hat{\theta}_n}) \geq \frac{C}{2} \sqrt{n} \|\hat{\theta}_n - \theta^*\| - \underbrace{\sqrt{n}W_1^{(\sigma)}(P_n, P)}_{=O_{\mathbb{P}}(1)},$$

which implies that  $\sqrt{n} \|\hat{\theta}_n - \theta^*\| = O_{\mathbb{P}}(1)$ . Let  $H_n(t) := \|\mathbb{G}_n^{(\sigma)} - \langle t, D^{(\sigma)} \rangle\|_{\text{Lip}_{1,0}}$  and  $H(t) := \|\mathbb{G}_P^{(\sigma)} - \langle t, D^{(\sigma)} \rangle\|_{\text{Lip}_{1,0}}$ . Both  $H_n(t)$  and  $H(t)$  are convex in  $t$ . Then, from equation (9), for  $\hat{t}_n := \sqrt{n}(\hat{\theta}_n - \theta^*) = O_{\mathbb{P}}(1)$ , we have

$$\sqrt{n}W_1^{(\sigma)}(P_n, Q_{\hat{\theta}_n}) = H_n(\hat{t}_n) + o_{\mathbb{P}}(1).$$

Combining the result (10) and the definition of  $\hat{\theta}_n$ , we see that  $H_n(\hat{t}_n) \leq \inf_{t \in \mathbb{R}^{d_0}} H_n(t) + o_{\mathbb{P}}(1)$ . Since  $\mathbb{G}_n^{(\sigma)}$  converges weakly to  $G_P^{(\sigma)}$  in  $\ell^\infty(\text{Lip}_{1,0})$ , by the continuous mapping theorem, we have  $(H_n(t_1), \dots, H_n(t_k)) \xrightarrow{d} (H(t_1), \dots, H(t_k))$  for any finite number of points  $t_1, \dots, t_k \in \mathbb{R}^{d_0}$ . By assumption,  $\text{argmin}_{t \in \mathbb{R}^{d_0}} H(t)$  is unique a.s. Hence, by Lemma 6, we conclude that  $\hat{t}_n \xrightarrow{d} \text{argmin}_{t \in \mathbb{R}^{d_0}} H(t)$ .  $\square$

**Remark 6** (Alternative proofs). *Corollary 2 alternatively follows from the proof of Theorem 4 combined with the argument given at the end of p. 63 in [2] (plus minor modifications), or the result of Theorem 5 combined with the argument given at the end of p. 67 in [2]. The proof provided above is differs from both these arguments and is more direct.*

## C Additional Experiments

Figure 4 shows the one-dimensional limiting distributions for: (a) the mean and variance of an MSWE-based generative model fitted to  $P = \mathcal{N}(\mu_*, \sigma_*^2)$ , with  $\mu_* = 0$  and  $\sigma_* = 1$ ; and (b) the two mean parameters of the mixture  $P = 0.5\mathcal{N}(\mu_1, 1) + 0.5\mathcal{N}(\mu_2, 1)$ , for  $\mu_1 = 0$  and  $\mu_2 = 1$  (repeated from the main text). Also shown on a log-log scale (with 1-sigma error bars) is the SWD convergence as a function of  $n$ .
